# Supplementary material
Source: publisher site journal article supplement (https://www.dovepress.com/article/350790)
Supplement: Supplementary file 1 [file get_supplementary_file.php]

# Supplementary materials

**Table S1.** Detail of economic inputs considered in the base case (I)

| **Pharmacological costs** | | | | | | | | | |
| --- | --- | --- | --- | --- | --- | --- | --- | --- | --- |
| **Active substance** | **Recommended dose**1 | | **Retail price**2 | **RDL 8/2010**3 | **Cost/cycle (6 months)** | | **Use in SOC (%)** | | **Use in FLS (%)** | |
| Vitamin D3 | 800 IU/day | | € 3.12 | 0.0% | € 22.78 | | 100.0% | | 100.0% | |
| Calcium | 1,000 mg/day | | € 7.43 | 15.0% | € 38.40 | | 100.0% | | 100.0% | |
| Raloxifene | 60 mg/day | | € 20.63 | 0.0% | € 134.49 | | 1.5% | | 0.0% | |
| Bazedoxifene | 20 mg/day | | € 34.40 | 7.5% | € 207.42 | | 1.5% | | 0.0% | |
| Teriparatide | 20 μg/day | | € 317.27 | 7.5% | € 1,912.84 | | 1.0% | | 1.0% | |
| Alendronate | 70 mg/week | | € 9.99 | 0.0% | € 65.14 | | 35.5% | | 35.0% | |
| Ibandronate | 150 mg/month | | € 39.00 | 0.0% | € 79.08 | | 11.8% | | 11.7% | |
| Risedronate | 5 mg/day | | € 19.84 | 0.0% | € 129.34 | | 23.7% | | 23.3% | |
| Denosumab | 60 mg/6 months | | € 225.59 | 7.5% | € 209.45 | | 25.0% | | 29.0% | |
| **Costs attributed to FLS** | | | | | | | | | |
| **Category** | | **Health resource** | | | | **Frequency of use** | | **Unit cost**4 | |
| FLS, initial evaluation | | Nursing telephone consultation, first | | | | 100.0% | | € 13.71 | |
| Specialist consultation, initial | | | | 10.0% | | € 114.21 | |
| Bone densitometry | | | | 55.0% | | € 87.82 | |
| Det. globular sedimentation rate | | | | 100.0% | | € 1.37 | |
| Basic blood test | | | | 100.0% | | € 5.96 | |
| Complete biochemical panel | | | | 100.0% | | € 85.60 | |
| Det. serum calcium | | | | 100.0% | | € 1.92 | |
| Det. serum alkaline phosphatase | | | | 100.0% | | € 2.20 | |
| Det. vitamin D 25-OH in serum | | | | 100.0% | | € 51.10 | |
| Det. Thyrotropin | | | | 100.0% | | €20.78 | |
| Det. parathyroid hormone | | | | 10.0% | | €34.42 | |
| Det. phosphorus and calcium in urine | | | | 10.0% | | €5.73 | |
| Det. of free testosterone | | | | 30.0% | | €20.02 | |
| Det. luteinizing hormone | | | | 2.0% | | €15.75 | |
| Det. follicle-stimulating hormone | | | | 2.0% | | €15.97 | |
| Det. C-reactive protein | | | | 100.0% | | €79.56 | |
| Patient training (nursing consultation) | | | | 100.0% | | €29.79 | |
| FLS, subsequent follow-up | | Follow-up visit to the specialist (month 4) | | | | 100.0% | | €86.12 | |
| Nursing telephone consultation, successive (month 3) | | | | 100.0% | | €7.00 | |
| Nursing telephone consultation, successive (month 6) | | | | 100.0% | | €7.00 | |
| Follow-up visit to the specialist (month 12) | | | | 50.0% | | €86.12 | |
| Nursing telephone consultation, successive (month 12) | | | | 100.0% | | €7.00 | |
| Nursing telephone consultation, successive (month 24) | | | | 100.0% | | €7.00 | |

**Abbreviations:** Det.: Determination; FLS: Fracture Liaison Service; RDL; Royal Decree Law; SOC: Standard of care.

**Table S2.** Detail of economic inputs considered in the base case (II)

| **Costs attributed to subsequent fractures** | | | | | |
| --- | --- | --- | --- | --- | --- |
| **Type of fracture** | **Health resource** | | | **Frequency of use** | **Unit cost** 4,5 |
| Hip fracture | Hospitalization associated with hip fracture | | | 100.0% | €9,028.64 |
| Emergency consultation, no hospitalization | | | 100.0% | €173.20 |
| Total | | | | €9,201.84 |
| Vertebral fracture | Hospitalization associated with vertebral fracture | | | 33.3% | €5,671.99 |
| Emergency consultation, no hospitalization | | | 100.0% | €173.20 |
| Total | | | | €2,063.86 |
| Forearm fracture | Hospitalization associated with forearm fracture | | | 12.5% | €5,041.30 |
| Emergency consultation, no hospitalization | | | 100.0% | €173.20 |
| Total | | | | €803.36 |
| Humerus fracture | Hospitalization associated with humerus fracture | | | 12.5% | €5,366.84 |
| Emergency consultation, no hospitalization | | | 100.0% | €173.20 |
| Total | | |  | €844.06 |
| **End-of-life costs** | | | | | |
| **Health resource** | | **Frequency of use** | **Duration of use** | | **Unit cost**4,5 |
| Palliative care unit | | 5.0% | 2–3 weeks until death (mean 14.9 days) | | €399.68 /day |
| Home, with medical follow-up | | 12.5% | 2–3 visits/week until death (mean 8.7 visits) | | €85.66 /visit |
| Home, with nursing follow-up | | 12.5% | 2–3 visits/week until death (mean 8.7 visits) | | €54.46 /visit |
| Acute hospitalization unit | | 70.0% | <1 week until death (mean 3.1 days) | | €1,158.65 /day |

**Table** **S3.** Inputs and range of variability assessed through the DSA (I)

| **Category** | **Variable** | **Base case** | **Lower limit** | **Upper limit** |
| --- | --- | --- | --- | --- |
| General | Initial age (years) | 65.00 | 52.00 | 78.00 |
| Proportion of women (%) | 90.7% | 72.5% | 100.0% |
| Time-preference deduction – costs (%) | 3.0% | 0.0% | 5.0% |
| Time-preference deduction – effectiveness (%) | 3.0% | 0.0% | 5.0% |
| General population utility; women | Age: 60-64 years | 0.865 | 0.851 | 0.879 |
| Age: 65-69 years | 0.846 | 0.831 | 0.860 |
| Age: 70-74 years | 0.793 | 0.774 | 0.811 |
| Age: 75-79 years | 0.770 | 0.752 | 0.788 |
| Age: 80-84 years | 0.663 | 0.637 | 0.690 |
| Age: ≥85 years | 0.511 | 0.476 | 0.545 |
| General population utility; men | Age: 60-64 years | 0.922 | 0.909 | 0.935 |
| Age: 65-69 years | 0.923 | 0.910 | 0.935 |
| Age: 70-74 years | 0.897 | 0.881 | 0.913 |
| Age: 75-79 years | 0.846 | 0.824 | 0.868 |
| Age: 80-84 years | 0.777 | 0.747 | 0.807 |
| Age: ≥85 years | 0.673 | 0.630 | 0.717 |
| Disutilities | Treatment with bisphosphonates | -0.006 | -0.005 | -0.008 |
| Hip fracture | -0.170 | -0.136 | -0.204 |
| Vertebral fracture | -0.230 | -0.184 | -0.276 |
| Forearm fracture | -0.060 | -0.048 | -0.072 |
| Humerus fracture | -0.090 | -0.072 | -0.108 |
| Clinical parameters | Proportion of patients initiating osteoporosis treatment after fragility fracture; SOC group | 13.7% | 11.0% | 16.4% |
| Proportion of patients initiating osteoporosis treatment after fragility fracture; FLS group | 55.1% | 44.1% | 66.1% |
| Relative increase in persistence due to FLS (4 years) | 3.33 | 2.99 | 3.67 |
| 10-year risk of subsequent fractures in osteoporotic patients without treatment | 27.9% | 22.4% | 33.5% |
| 10-year risk of subsequent fractures in osteoporotic patients with treatment | 11.1% | 8.9% | 13.3% |
| Increased SMR due to hip fracture | 6.28 | 4.90 | 6.70 |
| Increase in SMR due to vertebral fracture | 2.01 | 1.59 | 2.87 |
| Increased SMR due to forearm fracture | 2.01 | 1.59 | 2.87 |
| Increase in SMR due to humerus fracture | 2.01 | 1.59 | 2.87 |

**Abbreviations:** FLS, Fracture Liaison Service; SMR, standardized mortality ratio; SOC, Standard of care.

**Table** **S4.** Inputs and range of variability assessed through the DSA (II)

| **Category** | **Variable** | **Base case** | **Lower limit** | **Upper limit** |
| --- | --- | --- | --- | --- |
| Unit costs | Cost of hospitalization for hip fracture | € 9,028.64 | € 7,222.91 | €10,834.37 |
| Cost of hospitalization for vertebral fracture | € 5,671.99 | € 4,537.59 | 6,806.38 |
| Cost of hospitalization for forearm fracture | € 5,041.30 | € 4,033.04 | € 6,049.56 |
| Cost of hospitalization for humerus fracture | € 5,366.84 | € 4,293.47 | € 6,440.21 |
| Emergency consultation, without hospitalization | € 173.20 | € 138.56 | € 207.84 |
| Bone densitometry | € 87.82 | € 70.26 | € 105.39 |
| Specialist consultation, initial | € 114.21 | € 91.37 | € 137.05 |
| Specialist consultation, successive | € 86.12 | € 68.89 | € 103.34 |
| Nursing consultation | € 29.79 | € 23.83 | € 35.75 |
| Nursing telephone consultation, first | € 13.71 | € 10.97 | € 16.45 |
| Nursing telephone consultation, successive | € 7.00 | € 5.60 | € 8.40 |
| Basic blood test | € 5.96 | € 4.76 | € 7.15 |
| Complete biochemical panel | € 85.60 | € 68.48 | € 102.72 |
| Panel liver function | € 19.99 | € 15.99 | € 23.99 |
| Det. serum calcium | € 1.92 | € 1.54 | € 2.30 |
| Det. serum phosphorus | € 2.20 | € 1.76 | € 2.64 |
| Det. serum alkaline phosphatase | € 2.20 | € 1.76 | € 2.64 |
| Det. vitamin D 25-OH in serum | € 51.10 | € 40.88 | € 61.32 |
| Det. thyrotropin | € 20.78 | € 16.62 | € 24.93 |
| Det. parathyroid hormone | € 34.42 | € 27.54 | € 41.31 |
| Det. calcium in urine | € 3.25 | € 2.60 | € 3.89 |
| Det. phosphorus in urine | € 2.49 € | € 1.99 | € 2.99 |
| Det. of free testosterone | € 20.02 | € 16.01 | € 24.02 |
| Det. luteinizing hormone | € 15.75 | € 12.60 | € 18.91 |
| Det. follicle-stimulating hormone | € 15.97 | € 12.78 | € 19.17 |
| Det. globular sedimentation rate | € 1.37 | € 1.10 | € 1.64 |
| Det. C-reactive protein | € 79.56 | € 63.65 | € 95.47 |

**Abbreviations:** Det., Determination.

**Table** **S5.** Inputs evaluated in the PSA (I)

| **Category** | **Input** | **Mean** | **Estimated SE** | **Alpha** | **Beta** | **Distribution** |
| --- | --- | --- | --- | --- | --- | --- |
| General | Mean age (years) | 65 | 96.04 | - | - | Normal |
| Female (%) | 90.7% | 0.18 | 1.43 | 0.15 | Beta |
| Utility in the general population, female | Age: 60-64 years | 0.865 | 0.01 | 20,467.79 | 0.00 | Gamma |
| Age: 65-69 years | 0.846 | 0.01 | 17,303.73 | 0.00 | Gamma |
| Age: 70-74 years | 0.793 | 0.01 | 11,285.46 | 0.00 | Gamma |
| Age: 75-79 years | 0.770 | 0.01 | 12,124.73 | 0.00 | Gamma |
| Age: 80-84 years | 0.663 | 0.01 | 5,575.11 | 0.00 | Gamma |
| Age: ≥85 years | 0.511 | 0.01 | 3,218.22 | 0.00 | Gamma |
| Utility in the general population, male | Age: 60-64 years | 0.922 | 0.01 | 21,394.52 | 0.00 | Gamma |
| Age: 65-69 years | 0.923 | 0.01 | 25,810.27 | 0.00 | Gamma |
| Age: 70-74 years | 0.897 | 0.01 | 14,912.90 | 0.00 | Gamma |
| Age: 75-79 years | 0.846 | 0.01 | 8,009.84 | 0.00 | Gamma |
| Age: 80-84 years | 0.777 | 0.01 | 4,340.48 | 0.00 | Gamma |
| Age: ≥85 years | 0.673 | 0.01 | 2,016.25 | 0.00 | Gamma |
| Disutilities | Treatment with bisphosphonates | -0.006 | - 0.00 | 25.00 | 0.00 | Gamma |
| Hip fracture | -0.170 | - 0.03 | 25.00 | 0.01 | Gamma |
| Vertebral fracture | -0.230 | - 0.05 | 25.00 | 0.01 | Gamma |
| Forearm fracture | -0.060 | - 0.01 | 25.00 | 0.00 | Gamma |
| Humerus fracture | -0.090 | - 0.02 | 25.00 | 0.00 | Gamma |
| Clinical parameters | Proportion of patients initiating osteoporosis treatment after fragility fracture (SOC) | 13.7% | 0.03 | 21.44 | 135.04 | Beta |
| Proportion of patients initiating osteoporosis after fragility fracture (FLS) treatment | 55.1% | 0.11 | 10.68 | 8.71 | Beta |
| Relative increase in persistence due to FLS (4 years) | 3.33 | 0.58 | 33.23 | 0.10 | Gamma |
| 10-year risk of subsequent fractures in osteoporotic patients without treatment | 27.9% | 0.06 | 17.74 | 45.74 | Beta |
| 10-year risk of subsequent fractures in osteoporotic patients with treatment | 11.1% | 0.02 | 22.11 | 176.89 | Beta |
| Increased SMR due to hip fracture | 6.28 | 2.88 | 4.74 | 1.32 | Gamma |
| Increase in SMR due to vertebral fracture | 2.01 | 0.66 | 9.41 | 0.21 | Gamma |
| Increased SMR due to forearm fracture | 2.01 | 0.66 | 9.41 | 0.21 | Gamma |
| Increase in SMR due to humerus fracture | 2.01 | 0.66 | 9.41 | 0.21 | Gamma |

**Abbreviations:** FLS, Fracture Liaison Service; SMR, standardized mortality ratio; SE; standard error; SOC, Standard of care.

**Table** **S6.** Inputs evaluated in the PSA (II)

| **Category** | **Input** | **Mean** | **Estimated SE** | **Alpha** | **Beta** | **Distribution** |
| --- | --- | --- | --- | --- | --- | --- |
| Unit costs | Cost of hospitalization for hip fracture | €9,028.64 | 1,805.73 | 25.00 | 361.15 | Gamma |
| Cost of hospitalization for vertebral fracture | €5,671.99 | 1,134.40 | 25.00 | 226.88 | Gamma |
| Cost of hospitalization for forearm fracture | €5,041.30 | 1,008.26 | 25.00 | 201.65 | Gamma |
| Cost of hospitalization for humerus fracture | €5,366.84 | 1,073.37 | 25.00 | 214.67 | Gamma |
| Emergency consultation, without hospitalization | €173.20 | 34.64 | 25.00 | 6.93 | Gamma |
| Bone densitometry | € 87.82 | 17.56 | 25.00 | 3.51 | Gamma |
| Specialist consultation, initial | € 114.21 | 22.84 | 25.00 | 4.57 | Gamma |
| Specialist consultation, successive | € 86.12 | 17.22 | 25.00 | 3.44 | Gamma |
| Nursing consultation | € 29.79 | 5.96 | 25.00 | 1.19 | Gamma |
| Nursing telephone consultation, first | € 13.71 | 2.74 | 25.00 | 0.55 | Gamma |
| Nursing telephone consultation, successive | € 7.00 | 1.40 | 25.00 | 0.28 | Gamma |
| Basic blood test | € 5.96 | 1.19 | 25.00 | 0.24 | Gamma |
| Complete biochemical panel | € 85.60 | 17.12 | 25.00 | 3.42 | Gamma |
| Panel liver function | €19.99 | 4.00 | 25.00 | 0.80 | Gamma |
| Det. serum calcium | €1.92 | 0.38 | 25.00 | 0.08 | Gamma |
| Det. serum phosphorus | €2.20 | 0.44 | 25.00 | 0.09 | Gamma |
| Det. serum alkaline phosphatase | €2.20 | 0.44 | 25.00 | 0.09 | Gamma |
| Det. vitamin D 25-OH in serum | €51.10 | 10.22 | 25.00 | 2.04 | Gamma |
| Det. thyrotropin | €20.78 | 4.16 | 25.00 | 0.83 | Gamma |
| Det. parathyroid hormone | €34.42 | 6.88 | 25.00 | 1.38 | Gamma |
| Det. calcium in urine | €3.25 | 0.65 | 25.00 | 0.13 | Gamma |
| Det. phosphorus in urine | €2.49 | 0.50 | 25.00 | 0.10 | Gamma |
| Det. of free testosterone | €20.02 | 4.00 | 25.00 | 0.80 | Gamma |
| Det. luteinizing hormone | € 15.75 | 3.15 | 25.00 | 0.63 | Gamma |
| Det. follicle-stimulating hormone | € 15.97 | 3.19 | 25.00 | 0.64 | Gamma |
| Det. globular sedimentation rate | € 1.37 | 0.27 | 25.00 | 0.05 | Gamma |
| Det. C-reactive protein | € 79.56 | 15.91 | 25.00 | 3.18 | Gamma |

**Abbreviations:** Det., Determination; SE; standard error

# References

1. WHO. Norwegian Institute of Public Health. ATC/DDD Index. Published 2022. Accessed March 3, 2022. https://www.whocc.no/atc_ddd_index/

2. CGCOF. Consejo General de Colegios Oficiales de Farmacéuticos. Portal Farma. BotPLUS. Published 2021. Accessed February 5, 2021. https://botplusweb.portalfarma.com/botplus.aspx

3. MSCBS. Ministerio de Sanidad, Consumo y Bienestar Social. Listado de medicamentos afectos por las deducciones del Real Decreto Ley 8/2010. Mayo 2020. Published 2020. Accessed February 5, 2021. https://www.mscbs.gob.es/profesionales/farmacia/pdf/DeduccionesMayo2020.pdf

4. Gisbert R, Brosa M. Spanish Health Costs and cost-effectiveness ratios Database: eSalud [Internet]. Barcelona: Oblikue Consulting, S.L. Published 2007. Accessed May 13, 2021. http://www.oblikue.com/bddcostes/

5. MSCyBS (Ministerio de Sanidad Consumo y Bienestar Social). Registro de Actividad de Atención Especializada – RAE-CMBD. Accessed May 13, 2021. https://pestadistico.inteligenciadegestion.mscbs.es/publicoSNS/S/rae-cmbd
